# Supplementary material for: A classical polarizable model for simulations of water and ice
Source: Royal Society of Chemistry journal article supplement (doi:10.1039/c1cp22198a), 2011-01-01
Supplement: c1cp22198a_2.pdf [file c1cp22198a_2.pdf]

# Classical polarizable model for simulations of water and ice: Supplementary material (data)

Linda Viererblová and Jiří Kolafa

## Viscosity from NEMD

The following three pictures show the shear viscosity as a function of parameter  $\xi = \dot{T}\eta$ . The force amplitude is

$$C_f = \sqrt{\frac{8\pi^2\xi N_f k}{V L_z^2 \rho^2}}.$$

The final value is the  $\xi \rightarrow 0$  limit determined from the quadratic fit.

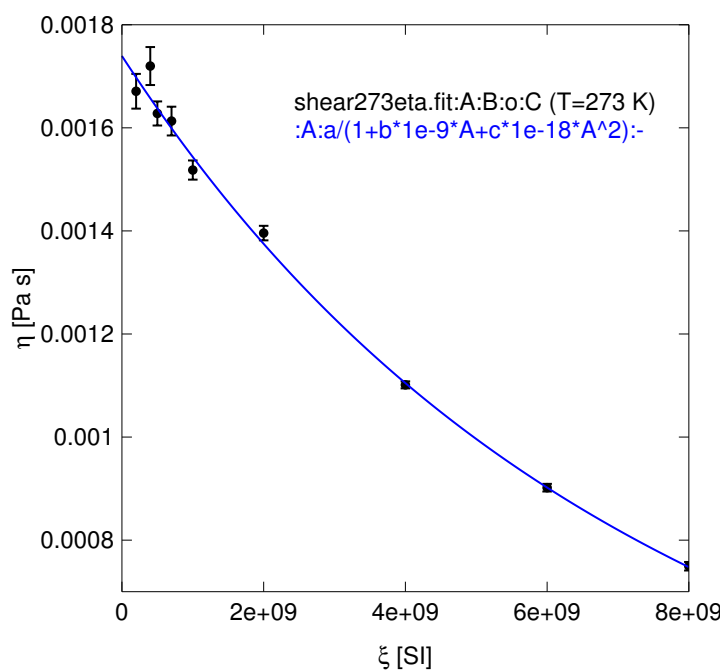

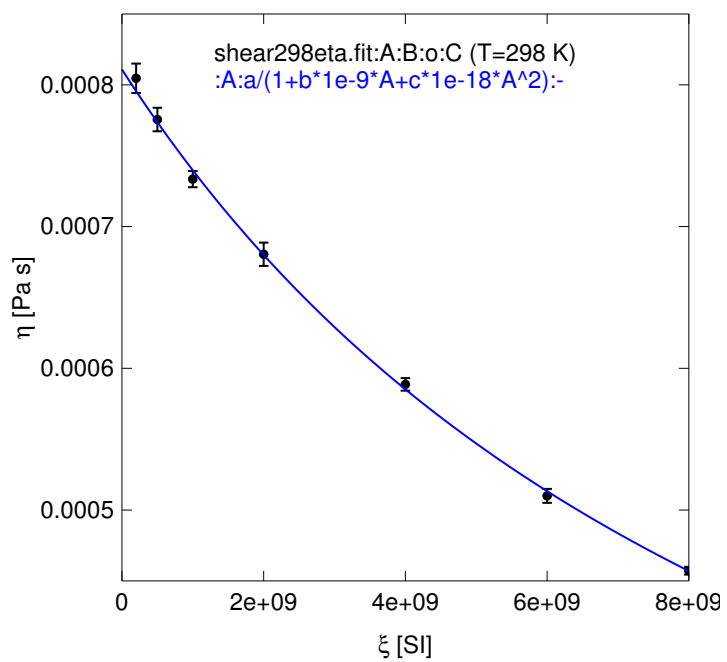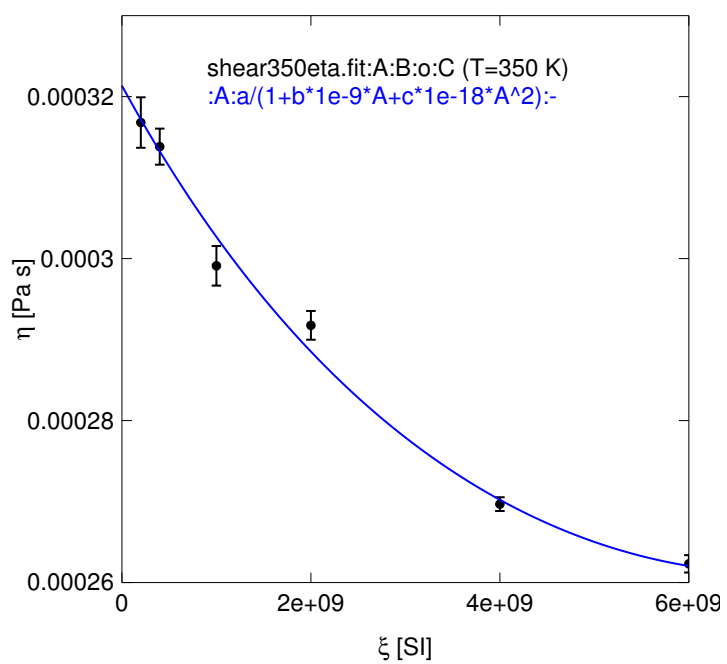

## Dielectric constant from external field

The following pictures show the dielectric constant as a function of squared saturation. The final value is the  $\varepsilon \rightarrow 0$  limit determined from the quadratic fit.

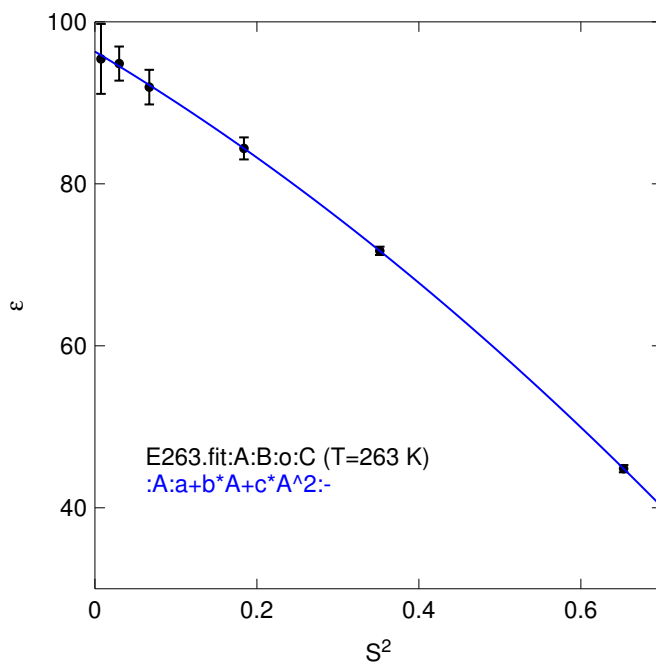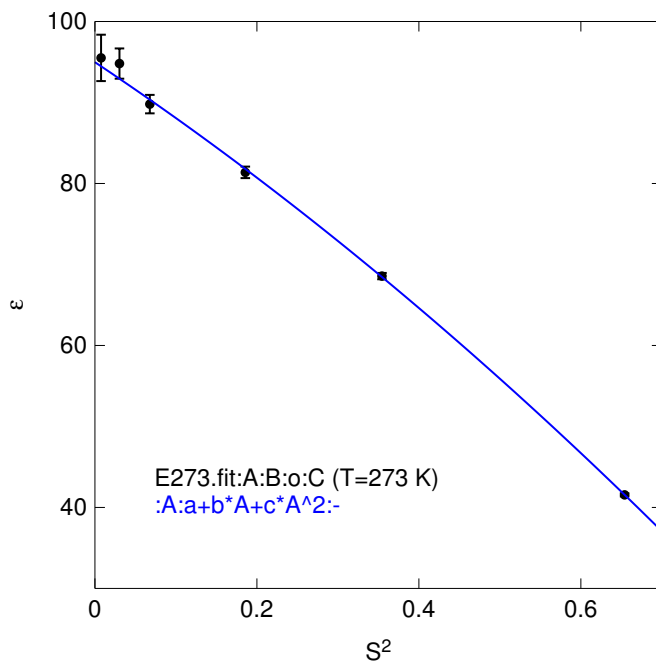

## Determinantion of diffusivity

The following pictures show functions

$$\langle SD(t) \rangle - bt$$

i.e., the squared displacement with removed linear part. The red points were not included in the fit. It is seen that  $MSD(t) = a + bt + ct^{-1/2}$  is an appropriate function to analyze the diffusion data.

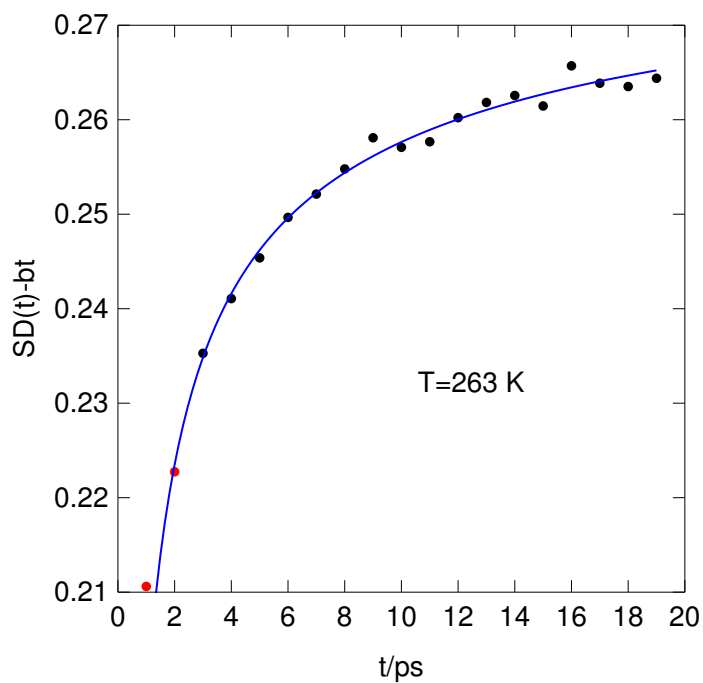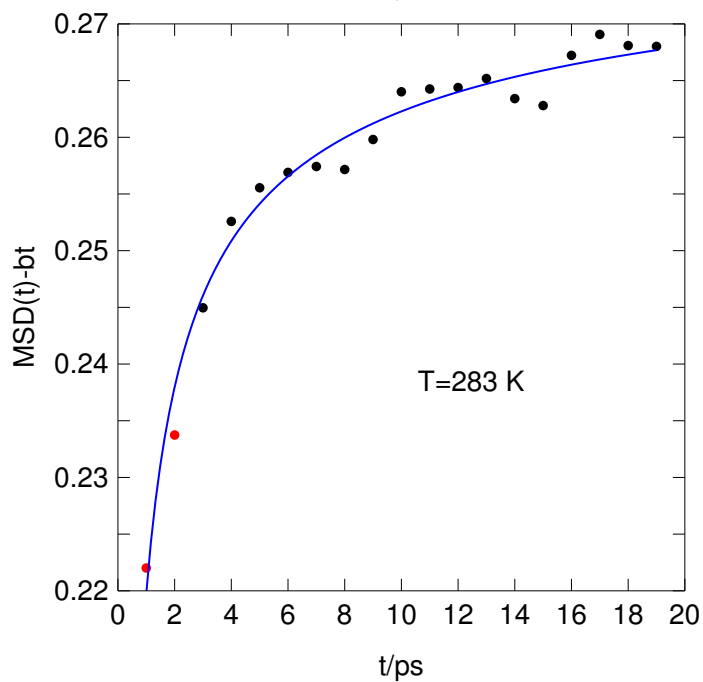

## Dielectric constant summary

Numbers in parentheses are estimated standard errors in the units of the last significant digit.

| $T/\text{K}$                      | $\epsilon_r$ | $\epsilon_r^\infty$ | comment     |
|-----------------------------------|--------------|---------------------|-------------|
| Fluctuation formula, $N = 360$ :  |              |                     |             |
| 263.005                           | 97.2(27)     | 1.70454(14)         |             |
| 273.053                           | 91.8(24)     | 1.70495(12)         |             |
| 282.998                           | 88.1(21)     | 1.70368(10)         |             |
| 298.041                           | 82.1(15)     | 1.69930(6)          |             |
| 319.964                           | 76.5(14)     | 1.68906(7)          |             |
| 349.802                           | 64.4(8)      | 1.66914(4)          |             |
| 273.001                           | 103.9(30)    | 1.73894(9)          | 100 MPa     |
| Of these, thermostats separately: |              |                     |             |
| 272.996                           | 92.2(32)     | 1.70503(13)         | Berendsen   |
| 273.150                           | 91.0(36)     | 1.70481(23)         | Nosé-Hoover |
| 297.982                           | 81.2(19)     | 1.69936(6)          | Berendsen   |
| 298.150                           | 83.8(25)     | 1.69919(13)         | Nosé-Hoover |
| External field, $N = 500$ :       |              |                     |             |
| 263                               | 96.3(15)     |                     |             |
| 273                               | 95.0(11)     |                     |             |
